1 **Original Article**

2

3 **Lack of latent tuberculosis screening in HIV patients and delay in Anti-**  
4 **Retroviral Therapy initiation in HIV-TB co-infection: A 11-year study in an**  
5 **intermediate TB-burden country**

6 Vannesa Yue May Teng<sup>1</sup>, Yan Ting Chua<sup>1</sup>, Eunice En Ni Lai<sup>1</sup>, Shilpa Mukherjee<sup>1</sup>,  
7 Jessica Michaels<sup>1</sup>, Chen Seong Wong<sup>2,3</sup>, Yee Sin Leo<sup>2,3,4</sup>, Barnaby Young<sup>2,3,4</sup>,  
8 Sophia Archuleta<sup>1,5</sup>, Catherine W.M. Ong<sup>1,5,6</sup>

9

10 **Affiliations**

11 <sup>1</sup>Department of Medicine, National University Hospital, National University Health  
12 System Singapore;

13 <sup>2</sup>National Centre for Infectious Disease, Singapore

14 <sup>3</sup>Department of Infectious Disease, Tan Tock Seng Hospital, Singapore

15 <sup>4</sup>Lee Kong Chian school of Medicine, Nanyang Technological University Singapore,  
16 Singapore

17 <sup>5</sup>Department of Medicine, Yong Loo Lin School of Medicine, National University of  
18 Singapore

19 <sup>6</sup>Institute for Health Innovation & Technology, National University of Singapore

20

21 Corresponding Author:

22 Vannesa Teng Yue May

23 10<sup>th</sup> floor Tower Block, 1E Kent Ridge Road, Singapore 119228

24 vannesa\_teng@nuhs.edu.sg

25 Telephone number: +65 98164277

26

27 Co-Corresponding Author

28 Catherine W.M. Ong

29 10<sup>th</sup> floor Tower Block, 1E Kent Ridge Road, Singapore 119228

30 Email: catherine\_wm\_ong@nuhs.edu.sg

31 Telephone number: +65 6772 7854

32

33 Word Count: 2505

34 Page count: 19

35 Figures: 3

36 References: 28

37

38 **ABSTRACT (250 words)**

39 **Objectives**

40 Tuberculosis (TB) is a common infection in HIV patients. Our study aims to determine  
41 the prevalence and characteristics of HIV-TB co-infected patients in Singapore, a  
42 high-income, intermediate TB-burden country.

43 **Methods**

44 Retrospective data of 11-years was obtained from the National University Hospital  
45 (NUH), a quaternary care hospital and the National Centre for Infectious Diseases,  
46 the national HIV centre.

47 **Results**

48 From December 2005 to December 2016, 48 out of 819 HIV patients and 272 out of  
49 3,196 HIV patients who were managed in NUH and TTSH respectively, were  
50 diagnosed with TB. 89.1% (n=285) were males and 2 (0.6%) were screened for  
51 latent TB on HIV diagnosis. The median age at TB diagnosis was 47.3 years old  
52 (Interquartile range, IQR 41-57). Mean CD4 count at TB diagnosis was  $125.0 \pm 153.9$   
53 cells/mm<sup>3</sup>. 124 (38.6%) patients had CD4 < 50 cells/mm<sup>3</sup>. 41.3% (n=132) of patients  
54 had HIV diagnosed at least 6 weeks before TB diagnosis, indicating an opportunity to  
55 initiate latent TB preventive therapy. 55.0% (n=176) had HIV and TB concomitantly  
56 diagnosed within 6 weeks whilst 2.25% (n=7) had TB diagnosed before HIV. Of those  
57 HIV-TB co-infected patients with CD4  $\leq$  50 cells/mm<sup>3</sup>, 18 (14.2%) had anti-retroviral  
58 therapy (ART) started <2 weeks. TB-related mortality was 5.3% (n=17) and 3.75%  
59 (n=12) were lost to follow-up.

60 **Conclusion**

61 There is a lack of latent TB screening in HIV patients and a delay in initiation of ART  
62 in HIV-TB patients with low CD4 counts in our study. Clinical practices can be further  
63 improved for the benefit of outcomes in HIV-TB patients.

64

65

66 **Introduction**

67 In 2019, there was an estimated 10 million new cases of tuberculosis (TB) diagnosed  
68 globally, of whom 815,000 of them were among people living with HIV (1). People  
69 living with HIV are more susceptible to active TB infection either from reactivation of  
70 latent infection or primary infection. HIV infection is estimated to increase the risks of  
71 developing TB by 16-27 times compared to those without HIV infection (2). TB  
72 remains the leading cause of death in the HIV population worldwide even though TB  
73 is both preventable and treatable. Globally, approximately 208,000 people with HIV  
74 died from TB in 2019, which may be worsened by the COVID-19 pandemic (1).  
75 Reasons for poorer clinical outcomes for HIV-TB co-infected patients include delays  
76 in initiation of anti-retroviral therapy (ART) and/or TB treatment, late detection of HIV-  
77 associated TB and multi-drug resistance TB (1).

78

79 World Health Organization (WHO) promotes preventive action through early  
80 systematic screening and treatment for active and latent TB at the time of HIV  
81 diagnosis (1). Treatment of latent TB infection (LTBI) is critical to reduce the risk of  
82 progression to active TB with an efficacy ranging 60-90% (3). The guidelines  
83 currently recommend testing LTBI using either Interferon Gamma Release Assay  
84 (IGRA) or Tuberculin skin test (TST) in high-income and upper middle-income  
85 countries with estimated TB incidence less than 100 per 100 000 as they are most  
86 likely to benefit due to resource availability and TB epidemiology (3). Despite the end  
87 TB strategy by WHO that aims to reduce the incidence rate of TB by 90% by 2035  
88 (4), many countries are still not adhering to current guidelines. According to WHO,  
89 the percentage of newly diagnosed HIV patients who received preventive LTBI  
90 treatment in 2017 in Singapore, Indonesia, India, Philippines, Vietnam, Myanmar,  
91 Cambodia was <1%, 16%, 10%, 57%, 31%, 17% and 21% respectively (5).

92

93 Singapore is a high-income economy country with an intermediate TB burden (6),  
94 and a healthcare system that is consistently ranked as accessible, equitable and  
95 cost-effective by international surveys (7)(8). In Singapore, HIV is managed mainly  
96 by the National Centre for Infectious Disease (NCID) and is the national HIV referral  
97 center. The HIV programme at the National University Hospital (NUH), a quaternary  
98 care centre, was established in 2010. In 2018, out of the 1,421 TB cases who had a  
99 HIV test performed, 28 cases (2.0%) were found to have HIV-TB co-infection (9).  
100 This study was performed to determine the number of active TB cases in HIV  
101 patients, and determine the clinical characteristics of this cohort of patients.

102

### 103 **Methods**

#### 104 *Study population*

105 Clinical data were retrospectively obtained from Communicable Disease Centre at  
106 TTSH (Tan Tock Seng Hospital), predecessor of the NCID (2005 - 2016) and NUH  
107 (2010 - 2016). We included all HIV-positive patients, confirmed by Western blot, of at  
108 least age 18, who were treated for TB in both hospitals between December 2005 and  
109 December 2016. Data collected were patient demographics including gender, age,  
110 comorbidities, HIV diagnosis (date of diagnosis, date of initiation of ART, CD4 count  
111 at HIV and TB diagnosis, HIV viral load at HIV and TB diagnosis, screening for LTBI  
112 at HIV diagnosis), TB characteristics (date of diagnosis, symptoms and duration of  
113 presentation, site of infection, method of diagnosis, presence of cavitation, chest  
114 radiograph (CXR) findings, physical examination findings), treatment of TB (TB  
115 regime and administration, development of IRIS) and clinical outcome (mortality, lost  
116 to follow up, TB recurrence, cause of death).

117

#### 118 *Definitions*

119 TB was microbiologically diagnosed by positive *Mycobacterium tuberculosis* cultures  
120 or nucleic acid tests. Patients were considered to have clinical TB if they were on TB

121 treatment despite having negative cultures or nucleic acid test. Acid Fast Bacilli  
122 (AFB) smear was graded from 0-4, HIV diagnosis was confirmed by Western blotting.  
123 CXR were scored 0-10 based on the number of segments involved as previously  
124 described by Lawson et al (10). For patients who received treatment in NUH, CXR  
125 was scored independently by 3 clinical researchers (Teng V.Y.M, Chua Y.T, Ong  
126 C.W.M), and a final score was obtained by the average of 3 scores. For patients  
127 managed in TTSH, CXR was scored by a senior clinical researcher (Young, B). LTBI  
128 was diagnosed using an interferon gamma release assay (IGRA) (Quantiferon-TB  
129 Gold plus; Qiagen) or T-spot TB test (Oxford Immunotec) and/or tuberculin skin test  
130 using purified protein derivative (PPD) solution with a cut-off of 10mm as per local  
131 practice (9). Multidrug resistant TB was defined as *M.tuberculosis* resistant to both  
132 isoniazid and rifampicin. Patients were considered lost to follow-up if they did not turn  
133 up for follow up visits after starting treatment or if they have left the country without  
134 completion of treatment.

135

#### 136 *Data Analysis*

137 SPSS software (IBM SPSS, Version 24, USA) and Graphpad Prism (Version 7.0)  
138 was used to perform descriptive statistical analyses. Correlation analysis was  
139 performed using Spearman's coefficients and a  $p < 0.05$  was considered statistically  
140 significant.

141

#### 142 *Ethics*

143 Ethics approval was granted by NHG Domain Specific Review Board (reference  
144 number 2015/00945).

145

#### 146 **Results**

147 During the 11-year study period, 4,015 HIV patients received medical treatment at  
148 TTSH and NUH hospital. 48 out of 819 HIV patients and 272 out of 3,196 HIV

149 patients were diagnosed with TB, in NUH and TTSH respectively. Out of 320 eligible  
150 patients, the majority were male, with a median age of 47.3 years (IQR 41-57) at TB  
151 diagnosis. 93.8% of this cohort of patients were microbiologically-proven TB.  
152 Smokers comprised 45% of the cohort and a small proportion had diabetes-mellitus  
153 (12.5%) (Table 1).

154

155 The mean CD4 count at TB diagnosis was  $125 \pm 153.9$  cells/mm<sup>3</sup> (mean  $\pm$  S.D.) with  
156 76% of patients having a CD4 count  $\leq 200$  cells/mm<sup>3</sup> at the point of TB diagnosis,  
157 indicating profound immunosuppression. Only 2 (0.6%) patients were screened for  
158 LTBI upon HIV diagnosis, with equal proportion of unscreened patients above and  
159 below CD4 count of 200 cells/mm<sup>3</sup> (Table 1). Both patients were negative for LTBI by  
160 IGRA or TST. Irrespective of CD4 counts, 13%, 23% and 39% of patients had ART  
161 started <2 weeks, 2-8 weeks, >2 months of TB diagnosis respectively. Of those with  
162 CD4  $\leq 50$  cells/mm<sup>3</sup>, only 18 (14.2%) had ART started within 2 weeks.

163

164 The most common clinical presentation for TB were fever (75.9%), cough (62%) and  
165 weight loss (53.4%). 143 (44.7%) patients had only pulmonary involvement; 39  
166 (12.2%) patients had extrapulmonary TB only and 135 (42.2%) patients had both  
167 pulmonary and extrapulmonary TB. In total, 278 (86.9%) eligible patients had  
168 pulmonary TB out of 320 patients. The lung was the most common site of TB  
169 involvement independent of CD4 count. The most common site of extrapulmonary TB  
170 was lymph node involvement for both cohorts above and below CD4 of 200  
171 cells/mm<sup>3</sup>. In patients with CD4  $\leq 200$  cells/mm<sup>3</sup>, 87% (n=213) had pulmonary TB  
172 whilst 59% (n=144) had extra-pulmonary TB (Figure 1A). However, in those with CD4  
173 > 200 cells/mm<sup>3</sup>, majority comprising 84% (n=53) had lung involvement whilst 39.6%  
174 (n=25) had extra-pulmonary TB involvement (Figure 1B).

175

176 Of those with pulmonary TB, the median CXR score was 4. We found that a total of  
177 84 (30.2%) patients had clear CXR despite the presence of pulmonary TB, most of  
178 whom were patients with lower CD4 counts. For patients with  $CD4 \leq 200$  cells/mm<sup>3</sup>  
179 with lung involvement, CXR can be normal which was seen in 37.9% (Figure 2A),  
180 and the same is observed in the relative immunocompetent group (Figure 2B). Most  
181 of patients in the  $CD4 \leq 200$  cells/mm<sup>3</sup> had positive AFB smear results (Figure 2C)  
182 with 10% (n=21) of patients with diffuse lung involvement, having a CXR score of 10  
183 (Figure 2A). However, in patients with  $CD4 > 200$  cells/mm<sup>3</sup> with lung involvement,  
184 only 17% (n=9) patients had clear CXR with a range of AFB smears (Figure 2D),  
185 whereas only 3.7% (n=2) patients had diffuse lung involvement (Figure 2B). In both  
186 groups, a wide range of AFB smear score from 0 to 4 can be present in patients with  
187 a normal CXR (Figure 2E and 2F), indicating that immunocompromised patients can  
188 remain highly infectious despite having a normal CXR. Similarly, it was possible to  
189 have an AFB smear score of 0 with diffuse TB lung involvement. Interestingly, the  
190 AFB smear was positively associated with the degree of CXR score in patients with  
191  $CD4 > 200$  cells/mm<sup>3</sup> ( $r = 0.33$ ,  $p < 0.05$ ) but this association was not found in patients  
192 whose  $CD4 \leq 200$  cells/mm<sup>3</sup> (Figure 2E and 2F).

193

194 41.3% (n=132) of patients had HIV diagnosed at least 6 weeks prior to TB diagnosis  
195 with a median time-frame of 46 months (IQR 12-91 months) (Figure 3). The mean  
196 duration of active TB treatment was  $8.2 \pm 3.5$  months. The majority of patients (83%)  
197 were on directly observed treatment (DOT). A small proportion of patients had TB  
198 recurrence (3.8%) and development of immune reconstitution inflammatory  
199 syndrome (IRIS) (15.6%). Lost to follow-up rate (3.75%) was low, including those  
200 who left the country or defaulted follow-up. All cause-mortality was 10% (n=32), out  
201 of whom 53% consist of TB-related mortality (n=17) (Table 1).

202

## 203 **Discussion**

204 In our study, there was a significant proportion of patients (41%) who had HIV  
205 diagnosed at least 6 weeks before TB diagnosis. As culture is the gold standard for  
206 diagnosis of active TB and culture result takes 2 to 6 weeks to process, our study  
207 team considered 6 weeks to be a reasonable time frame to exclude concurrent HIV-  
208 TB on presentation (11). Our cohort mainly consisted of clinically advanced HIV  
209 disease as 76% had  $CD4 \leq 200$  cells/mm<sup>3</sup> at TB diagnosis. However, only 0.6%  
210 (n=2) of patients in this study had LTBI screened upon HIV diagnosis, which is a  
211 considerably low given WHO recommendations. In developed countries with low TB  
212 and HIV burden, the compliance of HIV services in implementing LTBI screening was  
213 often inadequate; the LTBI screening rates among HIV patients in United Kingdom,  
214 United States and New Zealand was 35%, 32% and 55% respectively (12)(13)(14).  
215 The local medical community can further improve on this aspect to prevent active TB  
216 in the HIV population.

217

218 Our study found higher rates of TB-HIV co-infection in males. This is in keeping with  
219 a systematic review done in the European Union which reported that the majority of  
220 HIV-TB co-infected cases were male and young adults, aged between 25-45 years  
221 (15). We also found that the prevalence of diabetes mellitus (DM) in our cohort was  
222 12% which was similar to a study conducted by Bizune et al in the United States,  
223 which reported a prevalence of 9% (16). The high proportion can be explained by  
224 diabetes predisposing to TB and ART increasing the risk of metabolic syndrome and  
225 thus predisposing to DM (17), and also underscores the increase in DM prevalence  
226 in developed countries.

227

228 Other significant findings in our study included lower than expected proportion (23%)  
229 of patients who were already on ART when diagnosed with TB. This is in contrast  
230 with studies in India and Africa which found that 58% and 40% of HIV-infected patient



231 were already receiving ART respectively (18)(19). This difference can be explained  
232 by a significant proportion (55%) of our cohort with TB and HIV diagnosed  
233 concomitantly within 6 weeks, hence many of them were not expected to be on ART  
234 when diagnosed with TB.

235

236 Existing studies have reported a variety of chest radiographic appearances of active  
237 TB in HIV-positive patients, depending on their level of immunity. In  
238 immunocompromised patients, clinical manifestations are atypical as AFB smear can  
239 often be positive with normal CXR, or infiltrates are more often present in the lower  
240 than the upper lobes (20). 33.5% of our cohort with pulmonary TB had normal CXR  
241 which is slightly higher than that reported in other studies which range from 6-21%  
242 (21) and may be due to our cohort being more immunocompromised with a mean  
243 CD4 count of 125 cells/mm<sup>3</sup>. Therefore, clinicians should exercise caution when  
244 using CXR to screen for active TB disease in HIV patients. A high index of suspicion  
245 especially in patients presenting with prolonged cough, is required for timely  
246 diagnosis of TB in HIV positive patients.

247

248 We found 90% of our HIV-TB cohort to be AFB smear positive with 89% in the group  
249 with CD4 ≤ 200 cells/mm<sup>3</sup> and 94% in the CD4 > 200 cells/mm<sup>3</sup>. This is in contrast to  
250 previous studies which reported lower prevalence rates (50-70%) with positive AFB  
251 sputum smears in HIV patients (21). This difference may be contributed by higher  
252 sensitivity used in our laboratory and other studies not reporting trace results from  
253 smear tests, leading to lower rates of smear negative results. The mycobacterial  
254 burden was also significantly associated with the degree of CXR involvement only in  
255 those with CD4 > 200 cells/mm<sup>3</sup>.

256

257 WHO recommends initiation of ART for HIV-TB coinfecting patients within the first 2  
258 months of starting TB treatment and within 2 weeks in those severely

259 immunocompromised patients with CD4 counts  $<50$  cells/mm<sup>3</sup>. Prompt initiation of  
260 ART to HIV-TB co-infected patients reduces mortality especially in advanced HIV  
261 disease (22). Our study showed that only 14% of patients with CD4  $\leq 50$  cells/mm<sup>3</sup>  
262 had ARV initiated within 2 weeks. In addition, there was a significant proportion  
263 (51.7%) of patients who initiated ART more than 2 months of TB diagnosis, out of  
264 which 89% were from patients managed prior to 2011. Majority of delay in ART  
265 initiation were prior to the revised WHO ART initiation guidelines in 2010 (23). A  
266 study by Escada et al in Brazil found that only 5.4% of patients were initiated on ART  
267 within 2 weeks of starting TB treatment, however their cohort had a higher median  
268 CD4 count of 91 cells/mm<sup>3</sup> (24).

269

270 DOT is recommended by WHO to promote TB treatment adherence as suboptimal  
271 adherence has been associated with unfavourable clinical outcomes (25). Our cohort  
272 was able to achieve 83% on DOT, with the remaining using self-administered  
273 treatment (SAT). There was a wide variability in the success of implementing DOT in  
274 other countries, ranging from 24% in South Africa (26) to 91% in Philippines in HIV-  
275 TB co-infected patients (27). The main challenges faced worldwide included poor  
276 public health infrastructure, poor social support, inadequate funding and lack of  
277 awareness about the strategy among practitioners especially in low income,  
278 developing countries (27). In our study, TB-related mortality rate was 5.3%. This is  
279 much lower than the global rate in 2008 in which TB accounted for about 26% of HIV-  
280 related deaths (28). Overall, there is ample room for improvement to comply with  
281 international guidelines to reduce mortality in our HIV population.

282

283 The main strength of this study is the detailed clinical data collected for analysis over  
284 a 11-year period of cohort of 320 patients. Study limitations include missing data  
285 given that this was a retrospective study. In addition, although one of our centres is a

286 referral centre for HIV in Singapore, our data may not be representative of the  
287 national HIV-TB situation of the country.

288

289 **Conclusion**

290 Early diagnosis of LTBI enables prompt effective treatment to prevent TB-associated  
291 deaths. Further improvements are needed to offer routine LTBI screening and  
292 treatment in all HIV patients, as recommended by the WHO. In our high-income  
293 intermediate TB burden country, there remains a good window of opportunity to  
294 reduce the prevalence of HIV-TB co-infection, together with prompt initiation of ART  
295 to improve treatment outcomes in this population.

296

297

298

299

300

301

302

303

304

305

306

307

308

309

310

311

312

313

314 **Acknowledgements**

315 Catherine W. M. Ong is funded by Singapore National Medical Research Council  
316 (NMRC/TA/0042/2015, CSAINV17nov014); National University Health System  
317 Singapore (NUHS/RO/2017/092/SU/01, CFGFY18P11,  
318 NUHSRO/2020/042/RO5+5/ad-hoc/1), iHealthtech in NUS and recipient of the Young  
319 Investigator Award, Institut Merieux, Lyon, France.

320

321 **Author contributions**

322 Ong C.W.M, Archuleta S. conceived the study. Teng V.Y.M., Chua Y.T., Lai E.E.N.,  
323 Mukherjee S., Michaels J. and Young B. obtained the data. Teng V.Y.M., Chua Y.T.,  
324 Lai E.E.N. analysed the data. Teng V.W.M, and Ong C.W.M co-wrote the first draft.  
325 All authors edited and approved the final version of the manuscript.

326

327

328

329

330

331

332

333

334

335

336

337

338

339

340

341

## 342 References

- 343 1. World Health Organization. Global Tuberculosis Report 2020 [Internet]. WHO.  
344 World Health Organization; [cited 2021 Jan 17]. Available from:  
345 [https://apps.who.int/iris/bitstream/handle/10665/336069/9789240013131-](https://apps.who.int/iris/bitstream/handle/10665/336069/9789240013131-eng.pdf)  
346 [eng.pdf](https://apps.who.int/iris/bitstream/handle/10665/336069/9789240013131-eng.pdf)
- 347 2. WHO | Tuberculosis and HIV [Internet]. WHO. World Health Organization; [cited  
348 2020 Jul 25]. Available from: [http://www.who.int/hiv/topics/tb/about\\_tb/en/](http://www.who.int/hiv/topics/tb/about_tb/en/)
- 349 3. WHO | WHO guidelines on the management of latent tuberculosis infection  
350 launched today [Internet]. WHO. World Health Organization; [cited 2020 Nov  
351 29]. Available from: [https://www.who.int/tb/features\\_archive/LTBI/en/](https://www.who.int/tb/features_archive/LTBI/en/)
- 352 4. WHO | The End TB Strategy [Internet]. WHO. World Health Organization; [cited  
353 2020 Nov 29]. Available from: <http://www.who.int/tb/strategy/end-tb/en/>
- 354 5. Paton NI, Borand L, Benedicto J, Kyi MM, Mahmud AM, Norazmi MN, et al.  
355 Diagnosis and management of latent tuberculosis infection in Asia: Review of  
356 current status and challenges. *International Journal of Infectious Diseases*.  
357 2019 Oct 1;87:21–9.
- 358 6. Tam G, Lai SW. Is Singapore on track to eliminate tuberculosis by 2030? A policy  
359 case study. *SAGE Open Med* [Internet]. 2019 May 19 [cited 2020 Jul 25];7.  
360 Available from: <https://www.ncbi.nlm.nih.gov/pmc/articles/PMC6537069/>
- 361 7. Bloomberg's Global Health Index For 2020 | Worldhealth.net Anti-Aging News  
362 [Internet]. [cited 2020 Nov 29]. Available from:  
363 <https://worldhealth.net/news/bloombergs-global-health-index-2020/>
- 364 8. Tandon A, Murray CJ, Lauer JA, Evans DB. Measuring Overall Health System  
365 Performance for 191 Countries. :23.
- 366 9. Communicable Diseases Surveillance Singapore 2018. [Internet]. Communicable  
367 Diseases Division, Ministry of Health, Singapore; [cited 2020 Nov 29]. Available  
368 from: [https://www.moh.gov.sg/docs/librariesprovider5/diseases-](https://www.moh.gov.sg/docs/librariesprovider5/diseases-updates/communicable-diseases-surveillance-in-singapore-2018210c9a3beaa94db49299c2da53322dce.pdf)  
369 [updates/communicable-diseases-surveillance-in-singapore-](https://www.moh.gov.sg/docs/librariesprovider5/diseases-updates/communicable-diseases-surveillance-in-singapore-2018210c9a3beaa94db49299c2da53322dce.pdf)  
370 [2018210c9a3beaa94db49299c2da53322dce.pdf](https://www.moh.gov.sg/docs/librariesprovider5/diseases-updates/communicable-diseases-surveillance-in-singapore-2018210c9a3beaa94db49299c2da53322dce.pdf)
- 371 10. Lawson L, Yassin MA, Thacher TD, Olatunji OO, Lawson JO, Akingbogun TI, et  
372 al. Clinical presentation of adults with pulmonary tuberculosis with and without  
373 HIV infection in Nigeria. *Scandinavian Journal of Infectious Diseases*. 2008  
374 Jan;40(1):30–5.
- 375 11. Kwan CK, Ernst JD. HIV and Tuberculosis: a Deadly Human Syndemic. *Clinical*  
376 *Microbiology Reviews*. 2011 Apr 1;24(2):351–76.
- 377 12. Latent tuberculosis infection screening and treatment in HIV: insights from  
378 evaluation of UK practice | *Thorax* [Internet]. [cited 2020 Dec 1]. Available from:  
379 <https://thorax.bmj.com/content/72/2/180>
- 380 13. Adams JW, Howe CJ, Andrews AC, Allen SL, Vinnard C. Tuberculosis screening  
381 among HIV-infected patients: tuberculin skin test vs. interferon-gamma release  
382 assay. *AIDS Care*. 2017 Dec;29(12):1504–9.

- 383 14. Anwara O, Patrick M, Edeogu C, Kelechi O, Moses A, Oka G. The prevalence of  
384 diabetes mellitus in human immunodeficiency virus seropositive subject's co-  
385 infected with mycobacterium tuberculosis. :8.
- 386 15. Pimpin L, Drumright LN, Kruijshaar ME, Abubakar I, Rice B, Delpech V, et al.  
387 Tuberculosis and HIV co-infection in European Union and European Economic  
388 Area countries. *European Respiratory Journal*. 2011 Dec 1;38(6):1382–92.
- 389 16. Bizune DJ, Kempker RR, Kagei M, Yamin A, Mohamed O, Holland DP, et al.  
390 Treatment Complexities Among Patients with Tuberculosis in a High HIV  
391 Prevalence Cohort in the United States. *AIDS Res Hum Retroviruses*. 2018 Dec  
392 1;34(12):1050–7.
- 393 17. Brown TT, Tassiopoulos K, Bosch RJ, Shikuma C, McComsey GA. Association  
394 between systemic inflammation and incident diabetes in HIV-infected patients  
395 after initiation of antiretroviral therapy. *Diabetes Care*. 2010 Oct;33(10):2244–9.
- 396 18. Kumar AMV, Singarajipura A, Naik B, Guddemane DK, Patel Y, Shastri S, et al.  
397 HIV-infected presumptive tuberculosis patients without tuberculosis: How many  
398 are eligible for antiretroviral therapy in Karnataka, India? *Journal of*  
399 *Epidemiology and Global Health*. 2017 Mar 1;7(1):11–9.
- 400 19. Pathmanathan I, Pasipamire M, Pals S, Dokubo EK, Preko P, Ao T, et al. High  
401 uptake of antiretroviral therapy among HIV-positive TB patients receiving co-  
402 located services in Swaziland. *PLOS ONE*. 2018 May 16;13(5):e0196831.
- 403 21. Lee MP, Chan JWM, Ng KKP, Li PCK. Clinical manifestations of tuberculosis in  
404 HIV-infected patients. *Respirology*. 2000 Dec;5(4):423–6.
- 405 22. WHO | Universal antiretroviral therapy (ART) for all HIV-infected TB patients  
406 [Internet]. WHO. World Health Organization; [cited 2020 Jul 8]. Available from:  
407 [https://www.who.int/hiv/topics/tb/art\\_hivpatients/en/](https://www.who.int/hiv/topics/tb/art_hivpatients/en/)
- 408 23. WHO | Antiretroviral therapy for HIV infection in adults and adolescents [Internet].  
409 WHO. World Health Organization; [cited 2021 Feb 7]. Available from:  
410 <https://www.who.int/hiv/pub/arv/adult2010/en/>
- 411 24. da Silva Escada RO, Velasque L, Ribeiro SR, Cardoso SW, Marins LMS,  
412 Grinsztejn E, et al. Mortality in patients with HIV-1 and tuberculosis co-infection  
413 in Rio de Janeiro, Brazil - associated factors and causes of death. *BMC Infect*  
414 *Dis*. 2017 May 30;17(1):373.
- 415 25. A patient-level pooled analysis of treatment-shortening regimens for drug-  
416 susceptible pulmonary tuberculosis | *Nature Medicine* [Internet]. [cited 2021 Jan  
417 17]. Available from: <https://www.nature.com/articles/s41591-018-0224-2>
- 418 26. Howell EM, Kigozi NG, Heunis JC. Community-based directly observed treatment  
419 for TB patients to improve HIV services: a cross-sectional study in a South  
420 African province. *BMC Health Serv Res* [Internet]. 2018 Apr 7 [cited 2020 Dec  
421 2];18. Available from: <https://www.ncbi.nlm.nih.gov/pmc/articles/PMC5889613/>
- 422 27. Cai E, Chua S, Tan M, Tambyah P. Tuberculosis care: enhancing directly  
423 observed therapy in a peri-urban, low socioeconomic status neighbourhood.  
424 *smedj*. 2019 Jul;60(7):334–6.

425 28. Getahun H, Gunneberg C, Granich R, Nunn P. HIV Infection—Associated  
426 Tuberculosis: The Epidemiology and the Response. *Clinical Infectious*  
427 *Diseases*. 2010 May 15;50(Supplement\_3):S201–7.

428

1 **Table 1: Baseline characteristics of HIV-TB co-infected patients**

| Characteristics                                    | N=320                              |
|----------------------------------------------------|------------------------------------|
| Gender, n (%)                                      |                                    |
| Male                                               | 285 (89.1)                         |
| Female                                             | 33 (10.3)                          |
| Transgender                                        | 2 (0.6)                            |
| Age at HIV diagnosis, median (IQR)                 | 43.4 (37-55)                       |
| Age at TB diagnosis, median (IQR)                  | 47.3 (41-57)                       |
| TB diagnosed by, n (%)                             |                                    |
| Nucleic acid tests (eg. GeneXpert)                 | 133 (41.4)                         |
| TB cultures                                        | 272 (84.7)                         |
| Clinical diagnosis                                 | 20 (6.2)                           |
| Previous TB history, n (%)                         | 26 (8.1)                           |
| Presence of TB contact history, n (%)              | 27 (8.4)                           |
| Smoker, n (%)                                      | 144 (44.9)                         |
| Alcoholism, n (%)                                  | 76 (23.7)                          |
| History of cancer, n (%)                           | 10 (3.1)                           |
| Diabetes mellitus, n (%)                           | 40 (12.5)                          |
| End Stage Kidney Disease, n (%)                    | 1 (0.3)                            |
| Hepatitis B, n (%)                                 | 31 (9.7)                           |
| Hepatitis C, n (%)                                 | 13 (4.0)                           |
| Receiving ART when diagnosed with TB, n (%)        | 74 (23.1)                          |
| Screened for latent TB upon HIV diagnosis, n (%) ¶ | 2 (0.6)                            |
| CD4 at TB diagnosis, mean ± s.d.                   | 125.0 ± 153.9cells/mm <sup>3</sup> |
| CD4 >200cell/mL, n (%)                             | 63 (19.6)                          |
| CD4 50-200 cells/mL, n (%)                         | 120 (37.4)                         |
| CD4 <50 cells/mL, n (%)                            | 124 (38.6)                         |
| Unknown, n (%)                                     | 13 (4.1)                           |
| HIV viral load at TB diagnosis, mean ± s.d.        | 935,142 ± 5,361,346 copies/ml      |
| Direct Observed Treatment, n (%)                   | 267 (83)                           |
| Multi-drug resistant TB, n (%)                     | 6 (1.9)                            |
| Time of starting ART, n (%)                        |                                    |
| CD4≤50 cells/mm <sup>3</sup>                       | 127 (39.7)                         |
| <2 weeks                                           | 18 (14.2)                          |
| 2-8 weeks                                          | 27 (21.3)                          |
| >8 weeks                                           | 57 (44.9)                          |
| CD4>50 cells/mm <sup>3</sup>                       | 179 (55.9)                         |
| <2 weeks                                           | 22 (12.3)                          |
| 2-8 weeks                                          | 44 (24.6)                          |
| >8 weeks                                           | 62 (34.6)                          |
| Recurrence of TB, n (%)                            | 12 (3.75)                          |
| Development of paradoxical IRIS, n (%)             | 50 (15.6)                          |
| Duration of TB treatment, mean ± s.d.              | 8.2 ± 3.5 months                   |
| Died, n (%)                                        | 32 (10)                            |
| TB-related                                         | 17 (5.3)                           |
| Non TB related                                     | 15 (4.7)                           |
| Lost to follow up, n (%)                           | 12 (3.75)                          |
| Time between HIV diagnosis and death, median (IQR) | 530 days (274-2413)                |

- 2 ART, Anti-retroviral therapy; HIV, Human immuno-deficiency virus; IQR, Inter-quartile  
3 range; IRIS, Immune reconstitution inflammatory syndrome; SD, standard deviation,  
4 TB, Tuberculosis.  
5 ¶: Latent TB defined by positive testing by TST (tuberculin skin test) or IGRA  
6 (interferon gamma release assay)



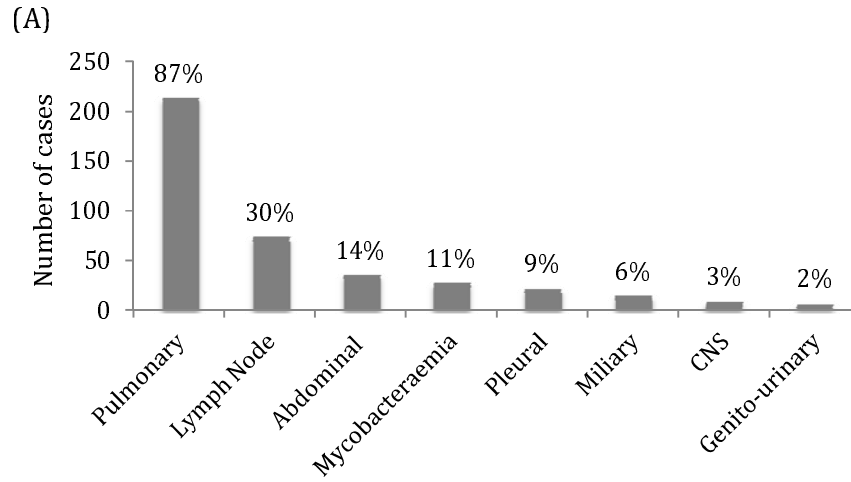

1

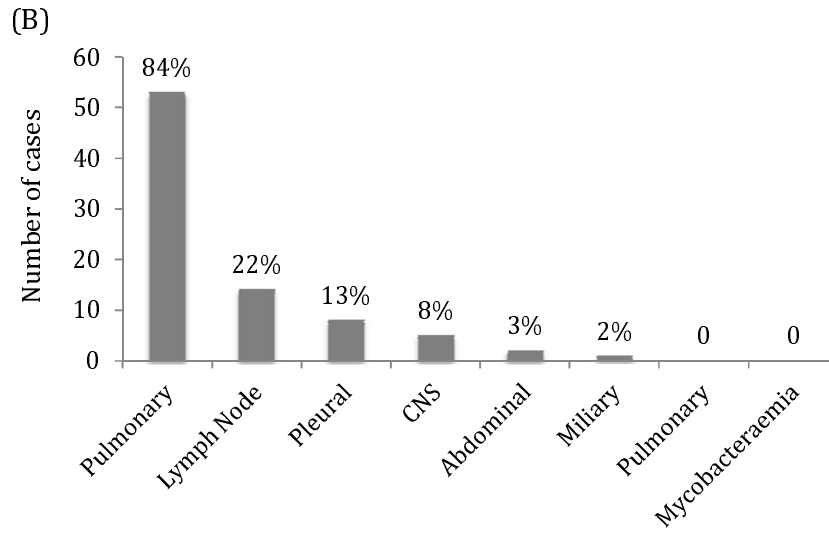

2

3 **Figure 1: Sites of TB infection in HIV-TB patients.** (A) Patients with CD4 $\leq$ 200  
4 cells/mm<sup>3</sup> at TB diagnosis. (B) Patients with CD4 $>$ 200 cells/mm<sup>3</sup> at TB diagnosis

1

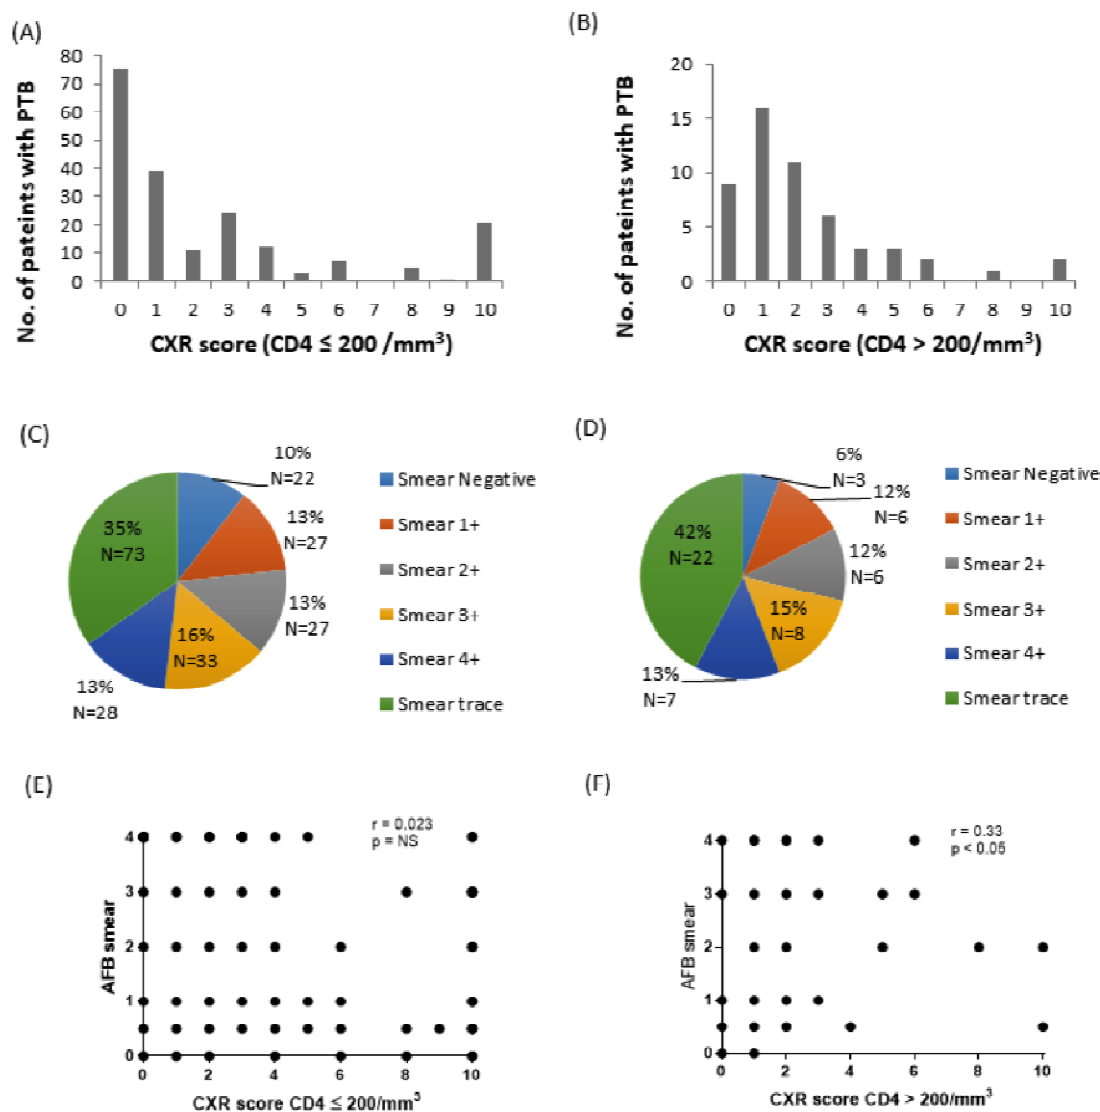

2

3 **Figure 2: Characteristics of pulmonary TB in HIV patients.**

- 4 (A) Chest radiograph score of patients with CD4 ≤ 200 cells/mm<sup>3</sup> at TB diagnosis. (B)  
 5 Chest radiograph score of patients with CD4 > 200 cells/mm<sup>3</sup> at TB diagnosis. (C)  
 6 AFB smear quantity in patients with pulmonary TB, with CD4 ≤ 200 cells/mm<sup>3</sup> at TB  
 7 diagnosis. (D) AFB smear quantity in patients with pulmonary TB, with CD4 > 200  
 8 cells/mm<sup>3</sup> at TB diagnosis. (E) Association of AFB smear with chest radiograph in  
 9 patients with CD4 ≤ 200 cells/mm<sup>3</sup> at TB diagnosis. (F) Association of AFB smear with  
 10 chest radiograph in patients with CD4 > 200 cells/mm<sup>3</sup> at TB diagnosis.

1

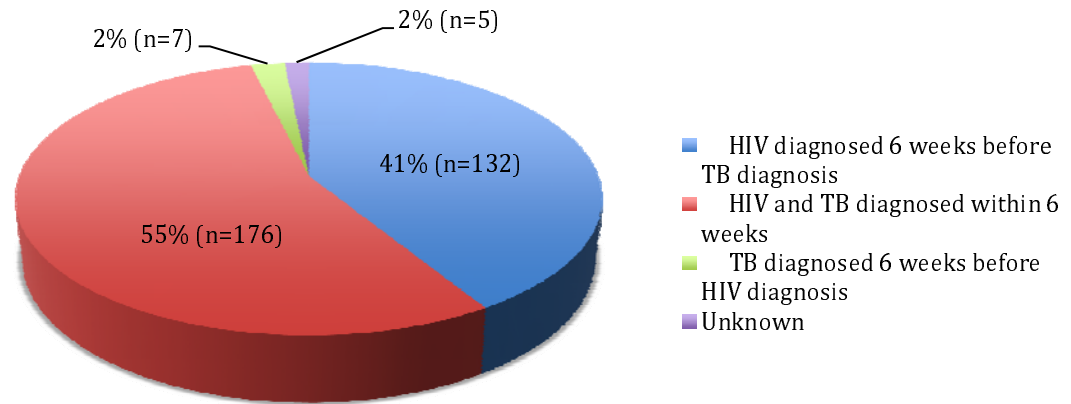

2  
3

**3: Time to TB diagnosis relative to HIV diagnosis**
